# Supplementary material for: Efficient neural network models of chemical kinetics using a latent asinh rate transformation
Source: Royal Society of Chemistry journal article supplement (doi:10.1039/d3re00212h), 2023-01-01
Supplement: d3re00212h1.pdf [file d3re00212h1.pdf]

## Electronic Supplementary Information

### Efficient Neural Network Models of Chemical Kinetics Using a Latent asinh Rate Transformation

Felix A. Döppel and Martin Votsmeier\*

\*martin.votsmeier@tu-darmstadt.de

June 12, 2023

#### 1 Linearizing Rate Expressions

$$r_j = k_{j,0} \cdot \exp\left(-\frac{E_A}{RT}\right) \cdot \prod_i c_i^{v_{i,j}} \cdot \prod_k \theta_k^{v_{k,j}} \quad (\text{S1})$$

$$\ln r_j = \ln k_{j,0} - \frac{E_A}{R} \cdot \frac{1}{T} + \sum_i v_{i,j} \cdot \ln c_i + \sum_k v_{k,j} \cdot \ln \theta_k \quad (\text{S2})$$

$$y = b + m \cdot x \quad (\text{S3})$$

#### 2 Preferential Oxidation Mechanism

**Table S1** Reactions and parameters for the PROX mechanism taken from<sup>1</sup> originating from<sup>2</sup>

| No.                                                               | Reaction                                           | $s_0$ or $A_0$<br>unitless or $s^{-1}$           | unitless           | $E_A$<br>kJ/mol | $\frac{dE_A}{d\theta_H}$<br>kJ/mol | $\frac{dE_A}{d\theta_O}$<br>kJ/mol | $\frac{dE_A}{d\theta_{OH}}$<br>kJ/mol | $\frac{dE_A}{d\theta_{H_2O}}$<br>kJ/mol | $\frac{dE_A}{d\theta_{CO}}$<br>kJ/mol |
|-------------------------------------------------------------------|----------------------------------------------------|--------------------------------------------------|--------------------|-----------------|------------------------------------|------------------------------------|---------------------------------------|-----------------------------------------|---------------------------------------|
| <b>H<sub>2</sub> oxidation on Pt</b>                              |                                                    |                                                  |                    |                 |                                    |                                    |                                       |                                         |                                       |
| R1                                                                | $H_2 + 2^* \rightleftharpoons 2H^*$                | $1.287 \times 10^{-1}$<br>$7.953 \times 10^{12}$ | 0.8584<br>1.911    | -<br>79.09      | -<br>-25.10                        | -<br>0                             | -<br>0                                | -<br>0                                  | -<br>0                                |
| R2                                                                | $O_2 + 2^* \rightleftharpoons 2O^*$                | $5.423 \times 10^{-1}$<br>$8.406 \times 10^{12}$ | 0.7656<br>0.9275   | -<br>208.9      | -<br>0                             | -<br>-133.9                        | -<br>0                                | -<br>0                                  | -<br>0                                |
| R3                                                                | $OH^* + ^* \rightleftharpoons O^* + H^*$           | $1.950 \times 10^{12}$<br>$6.325 \times 10^{12}$ | 13.286<br>10.812   | 111.2<br>32.48  | 67.321<br>-5.820                   | -4.87<br>22.26                     | 0<br>0                                | 62.89<br>-41.71                         | 0<br>0                                |
| R4                                                                | $H_2O^* + ^* \rightleftharpoons OH^* + H^*$        | $9.358 \times 10^{12}$<br>$9.989 \times 10^{12}$ | -0.3949<br>-0.3664 | 74.57<br>53.43  | 4.795<br>-7.757                    | 50.33<br>-87.75                    | 52.30<br>-52.30                       | -43.25<br>71.81                         | 0<br>0                                |
| R5                                                                | $H_2O^* + O^* \rightleftharpoons 2OH^*$            | $4.316 \times 10^{10}$<br>$1.700 \times 10^{10}$ | 0.3262<br>0.5285   | 36.74<br>94.32  | 0<br>0                             | 70.10<br>-139.12                   | 52.30<br>-52.30                       | -83.68<br>136.0                         | 0<br>0                                |
| R6                                                                | $H_2O + ^* \rightleftharpoons H_2O^*$              | $1.084 \times 10^{-1}$<br>$2.033 \times 10^{12}$ | 11.624<br>2.490    | -<br>39.98      | -<br>0                             | -<br>0                             | -<br>104.6                            | -<br>-10.46                             | -<br>0                                |
| <b>CO oxidation on Pt</b>                                         |                                                    |                                                  |                    |                 |                                    |                                    |                                       |                                         |                                       |
| R7                                                                | $CO + ^* \rightleftharpoons CO^*$                  | 1.000<br>$5.659 \times 10^{15}$                  | 0<br>0.3946        | -<br>165.9      | -<br>0                             | -<br>0                             | -<br>0                                | -<br>0                                  | -<br>-62.70                           |
| R8                                                                | $CO_2 + ^* \rightleftharpoons CO_2^*$              | $1.950 \times 10^{-1}$<br>$3.626 \times 10^{12}$ | 0.2500<br>0.2459   | -<br>11.60      | -<br>0                             | -<br>0                             | -<br>0                                | -<br>0                                  | -<br>0                                |
| R9                                                                | $CO_2^* + ^* \rightleftharpoons CO^* + O^*$        | $4.178 \times 10^{10}$<br>$2.393 \times 10^{11}$ | -0.2778<br>0.4558  | 110.4<br>85.42  | 0<br>0                             | 4.27<br>-17.69                     | 0<br>0                                | 0<br>0                                  | 24.21<br>-38.53                       |
| <b>Coupling reactions between CO- and H<sub>2</sub> oxidation</b> |                                                    |                                                  |                    |                 |                                    |                                    |                                       |                                         |                                       |
| R10                                                               | $CO_2^* + H^* \rightleftharpoons CO^* + OH^*$      | $8.031 \times 10^8$<br>$1.245 \times 10^9$       | -0.3259<br>0.8237  | 23.22<br>76.91  | -6.276<br>6.276                    | 60.25<br>-77.83                    | 0<br>0                                | -45.56<br>59.04                         | 18.12<br>-44.63                       |
| R11                                                               | $COOH^* + ^* \rightleftharpoons CO^* + OH^*$       | $8.426 \times 10^8$<br>$1.187 \times 10^9$       | 0.02577<br>0.4719  | 22.66<br>77.46  | 0<br>0                             | 60.25<br>-77.83                    | 0<br>0                                | -45.56<br>59.94                         | 18.13<br>-44.63                       |
| R12                                                               | $COOH^* + ^* \rightleftharpoons CO_2^* + H^*$      | $1.058 \times 10^{11}$<br>$9.454 \times 10^{10}$ | 0.5812<br>-0.1098  | 4.975<br>6.079  | 6.276<br>-62.844                   | 0<br>0                             | 0<br>0                                | 0<br>0                                  | 0<br>0                                |
| R13                                                               | $CO^* + H_2O^* \rightleftharpoons COOH^* + H^*$    | $1.103 \times 10^{11}$<br>$9.070 \times 10^{10}$ | 0.4911<br>-0.02778 | 98.71<br>22.79  | 4.904<br>-7.657                    | 0<br>0                             | 52.30<br>-52.30                       | -5.230<br>5.230                         | -31.38<br>31.38                       |
| R14                                                               | $CO_2^* + OH^* \rightleftharpoons COOH^* + O^*$    | $5.349 \times 10^{10}$<br>$1.870 \times 10^{11}$ | 0.05272<br>0.4515  | 109.5<br>29.70  | 0<br>0                             | -41.13<br>30.00                    | 0<br>0                                | 52.30<br>-52.30                         | 0<br>0                                |
| R15                                                               | $CO_2^* + H_2O^* \rightleftharpoons COOH^* + OH^*$ | $8.642 \times 10^{10}$<br>$1.157 \times 10^{11}$ | -0.0481<br>0.5647  | 71.31<br>49.07  | 0<br>0                             | 52.45<br>-85.62                    | 52.30<br>-52.30                       | -44.87<br>70.19                         | 0<br>0                                |
| R16                                                               | $CO_2^* + H^* \rightleftharpoons HCOO^* + ^*$      | $1.117 \times 10^{11}$<br>$8.957 \times 10^{10}$ | -0.07525<br>0.4218 | 73.49<br>0.00   | -12.55<br>0                        | 0<br>0                             | 0<br>0                                | 0<br>0                                  | 0<br>0                                |
| R17                                                               | $CO_2^* + OH^* \rightleftharpoons HCOO^* + O^*$    | $6.168 \times 10^{10}$<br>$1.621 \times 10^{11}$ | -0.3443<br>-0.1617 | 154.8<br>2.577  | 0<br>0                             | -67.47<br>3.657                    | 0<br>0                                | 100.2<br>-4.351                         | 0<br>0                                |
| R18                                                               | $CO_2^* + H_2O^* \rightleftharpoons HCOO^* + OH^*$ | $1.022 \times 10^{11}$<br>$9.785 \times 10^{10}$ | -0.3574<br>0.06665 | 111.8<br>17.15  | 0<br>0                             | 118.7<br>-19.40                    | 90.99<br>-13.61                       | -98.17<br>16.89                         | 0<br>0                                |

#### 3 Ammonia Oxidation Mechanism

Table S2 shows all 15 reversible reactions of the ammonia oxidation mechanism considered in this work, the activation energy  $E_A$  associated with the forward direction and the energy difference  $\Delta E$  of the reaction. Table S3 lists all non-imaginary frequencies  $\nu$  of the initial- and transition states. Values have to be multiplied by the elementary charge  $e$  and divided by Planck's constant  $h$  to convert to the unit Hz. Sticking coefficients of all adsorption reactions are assumed to be one.

**Table S2** All 15 reversible ammonia oxidation reactions, the activation energy  $E_A$  associated with the forward direction and the energy difference  $\Delta E$  of the reaction

| Reaction                                                                              | $E_A / \text{J mol}^{-1}$ | $\Delta E / \text{J mol}^{-1}$ |
|---------------------------------------------------------------------------------------|---------------------------|--------------------------------|
| $\text{O}_2 + 2^* \rightleftharpoons 2\text{O}^*$                                     | 0                         | -238 319                       |
| $\text{NH}_3 + ^* \rightleftharpoons \text{NH}_3^*$                                   | 0                         | -66 575                        |
| $\text{NH}_3^* + \text{O}^* \rightleftharpoons \text{NH}_2^* + \text{OH}^*$           | 67 540                    | 39 559                         |
| $\text{NH}_2^* + \text{O}^* \rightleftharpoons \text{NH}^* + \text{OH}^*$             | 78 153                    | -14 473                        |
| $\text{NH}^* + \text{O}^* \rightleftharpoons \text{N}^* + \text{OH}^*$                | 154 377                   | 31 840                         |
| $\text{NH}_3^* + \text{OH}^* \rightleftharpoons \text{NH}_2^* + \text{H}_2\text{O}^*$ | 33 770                    | -13 508                        |
| $\text{NH}_2^* + \text{OH}^* \rightleftharpoons \text{NH}^* + \text{H}_2\text{O}^*$   | 965                       | -67 540                        |
| $\text{NH}^* + \text{OH}^* \rightleftharpoons \text{N}^* + \text{H}_2\text{O}^*$      | 39 559                    | -22 192                        |
| $2\text{OH}^* \rightleftharpoons \text{O}^* + \text{H}_2\text{O}^*$                   | 0                         | -53 067                        |
| $\text{H}_2\text{O}^* \rightleftharpoons \text{H}_2\text{O} + ^*$                     | 18 332                    | 18 332                         |
| $2\text{N}^* \rightleftharpoons \text{N}_2 + 2^*$                                     | 244 108                   | -52 102                        |
| $\text{N}^* + \text{O}^* \rightleftharpoons \text{NO}^* + ^*$                         | 213 233                   | 3859                           |
| $\text{NO}^* \rightleftharpoons \text{NO} + ^*$                                       | 184 287                   | 184 287                        |
| $\text{N}^* + \text{NO}^* \rightleftharpoons \text{N}_2\text{O}^* + ^*$               | 164 990                   | 89 731                         |
| $\text{N}_2\text{O}^* \rightleftharpoons \text{N}_2\text{O} + ^*$                     | 0                         | -2895                          |

**Table S3** A list of all non-imaginary frequencies  $\nu$  of the initial states IS and transition states TS

| Species                 | Type | $\nu / \text{V}$                                                                                                       |
|-------------------------|------|------------------------------------------------------------------------------------------------------------------------|
| $\text{NH}_3^*$         | IS   | 0.4320 0.4319 0.4152 0.1936 0.1934 0.1342 0.0820 0.0819 0.0458 0.0150 0.0149                                           |
| $\text{NH}_2^*$         | IS   | 0.4327 0.4189 0.1800 0.0969 0.0954 0.0825 0.0595 0.0436 0.0269                                                         |
| $\text{NH}^*$           | IS   | 0.4242 0.0994 0.0992 0.0665 0.0588 0.0587                                                                              |
| $\text{N}^*$            | IS   | 0.0612 0.0612 0.0612                                                                                                   |
| $\text{N}_2\text{O}^*$  | IS   | 0.2980 0.1614 0.0541 0.0540 0.0225 0.0150 0.0149 0.0033                                                                |
| $\text{NO}^*$           | IS   | 0.1924 0.0512 0.0511 0.0388 0.0187 0.0184                                                                              |
| $\text{H}_2\text{O}^*$  | IS   | 0.4578 0.4448 0.1919 0.0635 0.0573 0.0167 0.0122 0.0114                                                                |
| $\text{OH}^*$           | IS   | 0.4391 0.0930 0.0896 0.0466 0.0244 0.0225                                                                              |
| $\text{O}^*$            | IS   | 0.0558 0.0454 0.0453                                                                                                   |
| *                       | IS   | -                                                                                                                      |
| $\text{NH}_3\text{-O}$  | TS   | 0.4379 0.4262 0.3916 0.1802 0.1211 0.1125 0.0810 0.0685 0.0641 0.0588 0.0418 0.0316 0.0201 0.0137                      |
| $\text{NH}_2\text{-O}$  | TS   | 0.4129 0.1870 0.1610 0.1155 0.1045 0.0786 0.0669 0.0576 0.0458 0.0332 0.0272                                           |
| $\text{NH-O}$           | TS   | 0.2167 0.1402 0.0776 0.0656 0.0569 0.0523 0.0355 0.0298                                                                |
| $\text{NH}_3\text{-OH}$ | TS   | 0.4564 0.4366 0.4309 0.4057 0.1952 0.1826 0.1033 0.0825 0.0671 0.0638 0.0426 0.0333 0.0270 0.0201 0.0143 0.0088 0.0065 |
| $\text{NH}_2\text{-OH}$ | TS   | 0.4623 0.4009 0.3930 0.1915 0.1032 0.0995 0.0750 0.0607 0.0569 0.0502 0.0460 0.0197 0.0178 0.0113                      |
| $\text{NH-OH}$          | TS   | 0.4531 0.2032 0.1503 0.1021 0.0783 0.0637 0.0626 0.0563 0.0448 0.0306 0.0198                                           |
| $\text{OH-OH}$          | TS   | 0.4549 0.1881 0.1673 0.1026 0.0799 0.0709 0.0632 0.0534 0.0368 0.0231 0.0180                                           |
| $\text{N-N}$            | TS   | 0.0716 0.0702 0.0537 0.0474 0.0228                                                                                     |
| $\text{N-O}$            | TS   | 0.0722 0.0613 0.0525 0.0299 0.0287                                                                                     |
| $\text{N-NO}$           | TS   | 0.2166 0.0731 0.0574 0.0515 0.0367 0.0339 0.0159 0.0060                                                                |

## 4 Training Times

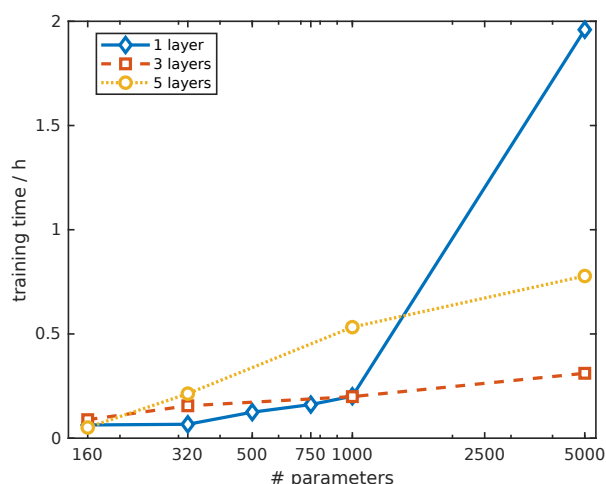

**Figure S1** Median training times of the neural networks predicting CO source terms with the latent hyperbolic sine transformation strategy. Measured using three threads of a Intel® Xeon® Platinum 9242 Processor each.

## 5 Comparing Relative Error and MATE

So far, we applied the inverse hyperbolic sine transformation in a latent way. To investigate the effects of the latent approach, we also applied the inverse hyperbolic sine transformation in the conventional way. This means data are transformed in a preprocessing step and the transformed values are used as targets to be learned by a conventional neural network. As shown in table S4, the conventional approach leads to relative prediction errors above 1000%, while the latent approach achieves 15%. This can be attributed to the fact that instead of the relative error, the conventional approach minimizes an error measure defined in terms of the transformed values  $\text{asinh}(\hat{s})$  which we call MATE. This error measure, however, is not relevant for reactor simulations.

**Table S4** Prediction errors of lightweight neural networks with 40 nodes in a single hidden layer ( $\approx 320$  parameters) modeling the CO source terms  $\hat{s}$  with two different approaches: Latent transformation minimizes the relative error during training resulting in an average accuracy of 15%. Conventional transformation minimizes the error of transformed values MATE instead.<sup>1</sup> Therefore, its predictions are two orders of magnitude less accurate, as measured by the relative error. Because MATE is not a relevant measure for the application in reactor simulations, the slightly better MATE score of the conventional approach poses no considerable advantage over the latent approach. The equations show how the errors are computed using the neural network predictions  $h$

| error measure  | equation                                              | latent (this work) | conventional |
|----------------|-------------------------------------------------------|--------------------|--------------|
| relative error | $\left  \frac{\hat{s} - h(\hat{s})}{\hat{s}} \right $ | 15 %               | >1000 %      |
| MATE           | $ \text{asinh}(\hat{s}) - h(\text{asinh}(\hat{s})) $  | 120 %              | 110 %        |

Figure S2 shows the relative error and the mean absolute transformed error MATE as a function of the predicted value. The exact value is arbitrarily chosen to be one. Both error measures share the same minimum and show similar asymptotic behavior for underestimations. Because of the logarithmic x-axis, the relative error grows exponentially for overestimations while MATE grows linearly. This leads to much more significant overestimations occurring in models trained with the conventional transformation approach as opposed to the latent approach.

<sup>1</sup>Actually, both approaches minimize the root mean square of the term shown in the respective equation, not the mean absolute which is reported in table S4. As the root mean square is more sensitive to outliers it is well suited for model training but not an intuitive indicator of the model quality.

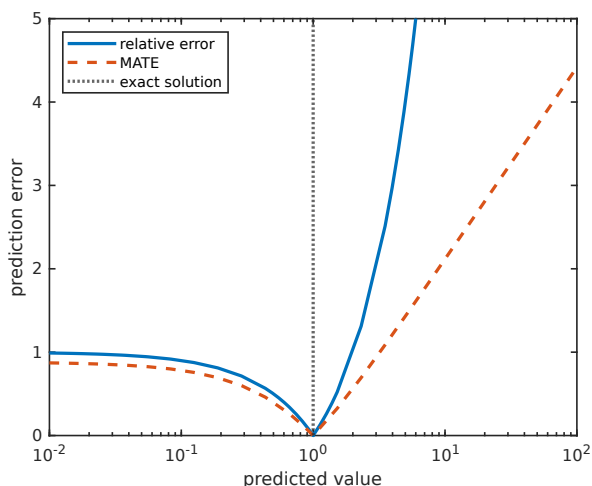

**Figure S2** Comparison between the relative error and the mean absolute transformed error MATE (y-axis) for different predicted values (x-axis) assuming an exact solution of one.

## 6 Comparing Conventional and Latent Transformation Results

Figure S3 shows the prediction accuracy gain when using latent inverse hyperbolic sine transformation instead of the conventional approach modeling steady state CO source terms from test case one. The numbers shown are computed by dividing the relative prediction error obtained with the conventional approach by the error of the latent approach.

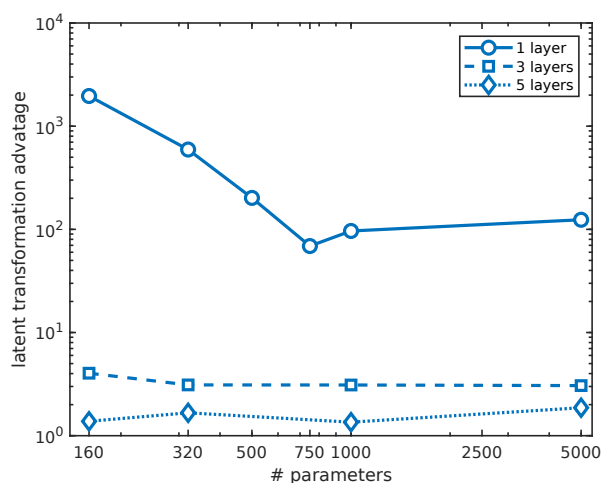

**Figure S3** The accuracy gain of latent over conventional data transformation is shown as the quotient between relative prediction errors of models with identical complexity modeling steady state CO source terms. Results are shown for different numbers of hidden layers as a function of the number of model parameters.

## 7 Inference Time

Source term prediction time  $t_{\text{predict}}$  for 100 000 reaction conditions is averaged over 1000 runs with the models used for the preferential oxidation plug-flow reactor simulations. Results are shown in table S5 using an AMD Ryzen 7 5800X CPU and a GEFORCE RTX 3070 GPU. Computing the exact solution on the same machine takes 800 s resulting in a speed-up of 45 700 on the CPU and 95 200 on the GPU.

**Table S5** Neural network prediction times  $t_{\text{predict}}$  for 100 000 reaction conditions averaged over 1000 measurements with the same models as used for the preferential oxidation plug-flow reactor simulations

| Hardware               | $t_{\text{predict}}(\text{O}_2) / \text{ms}$ | $t_{\text{predict}}(\text{CO}) / \text{ms}$ |
|------------------------|----------------------------------------------|---------------------------------------------|
| CPU: AMD Ryzen 7 5800X | 5.5                                          | 12                                          |
| GPU: GEFORCE RTX 3070  | 3.0                                          | 5.4                                         |

## 8 Comparing to our Previous Work Using Mechanistic Insights

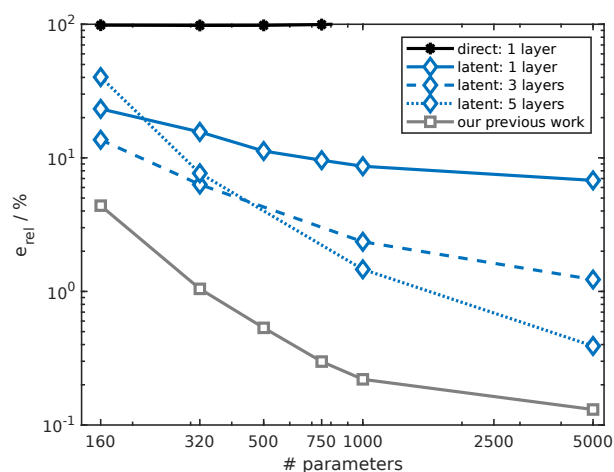

**Figure S4** Relative prediction error of CO source terms dependent of the total number of learnable parameters in a neural network compared between different modeling strategies. Our previous work<sup>1</sup> performs best but requires a reaction path analysis and therefore cannot be used with experimental data or highly complex computational models.

## 9 Alternatives to the Hyperbolic Sine

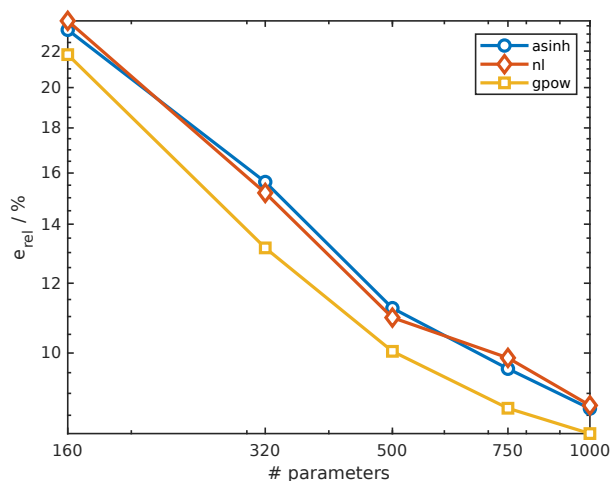

(a) ... CO source terms.

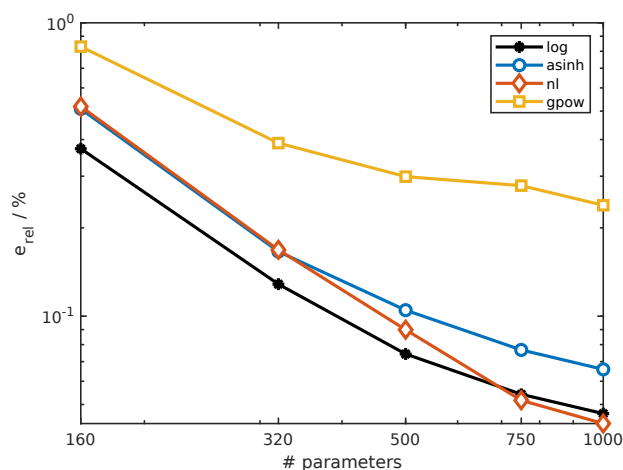

(b) ... O<sub>2</sub> source terms.

**Figure S5** Comparing the prediction accuracy of different transformation functions as a function of trainable model parameters in a single hidden layer for ...

## References

- [1] F. A. Döppel and M. Votsmeier, *Chemical Engineering Science*, 2022, **262**, 117964.
- [2] W. Hauptmann, M. Votsmeier, H. Vogel and D. G. Vlachos, *Applied Catalysis A: General*, 2011, **397**, 174–182.
