# Supplementary figures and images for: Efficient neural network models of chemical kinetics using a latent asinh rate transformation
Source: Royal Society of Chemistry journal article supplement (doi:10.1039/d3re00212h), 2023-01-01

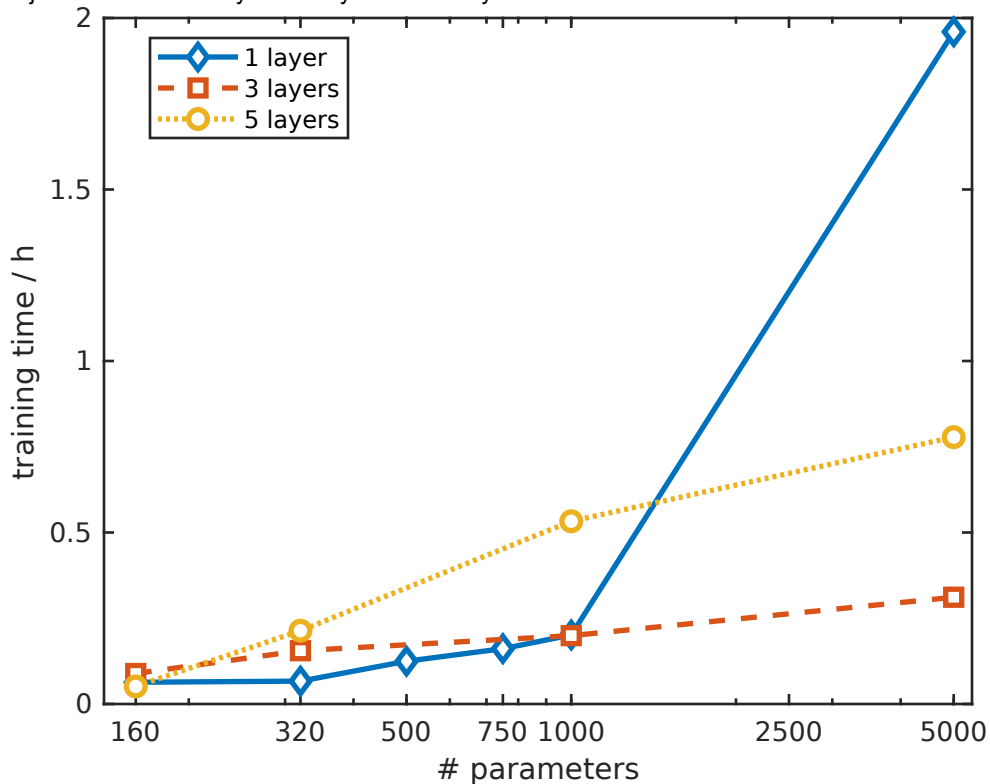

Supplement: d3re00212h2.pdf [file d3re00212h2.pdf]

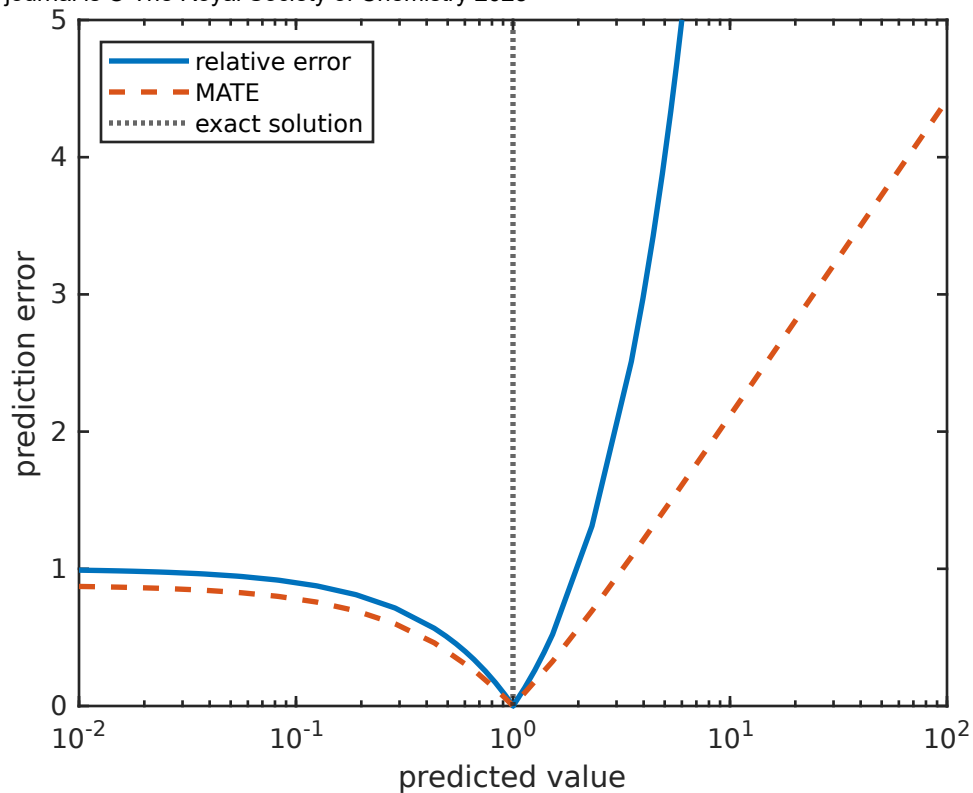

Supplement: d3re00212h3.pdf [file d3re00212h3.pdf]

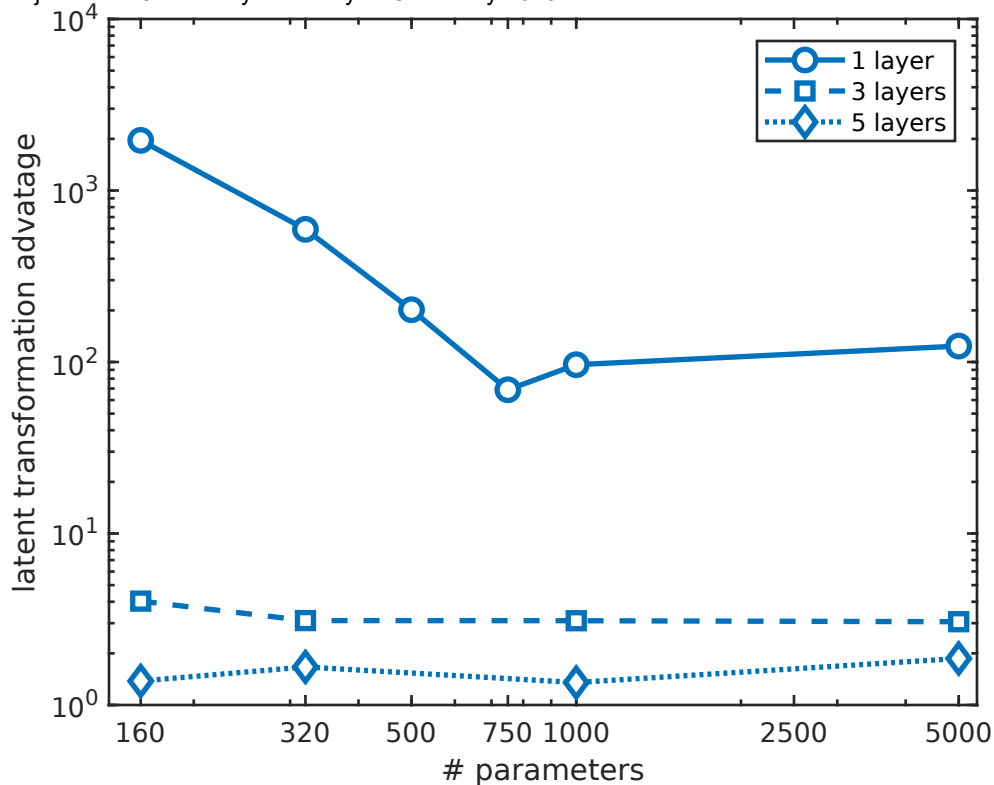

Supplement: d3re00212h4.pdf [file d3re00212h4.pdf]

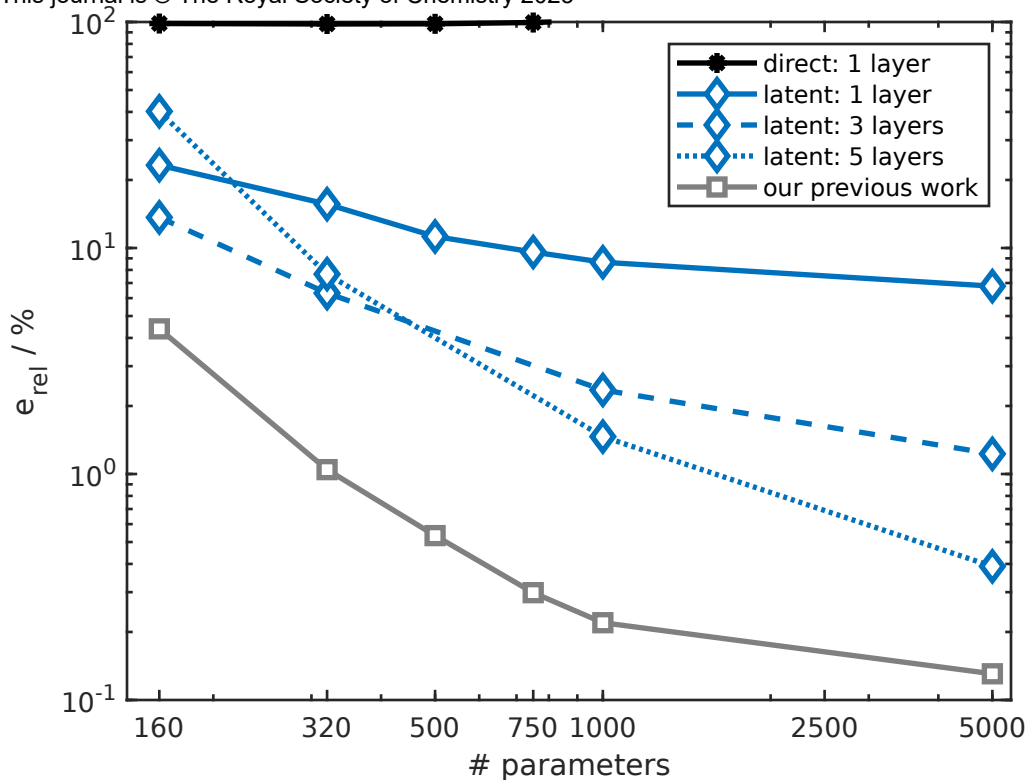

Supplement: d3re00212h5.pdf [file d3re00212h5.pdf]

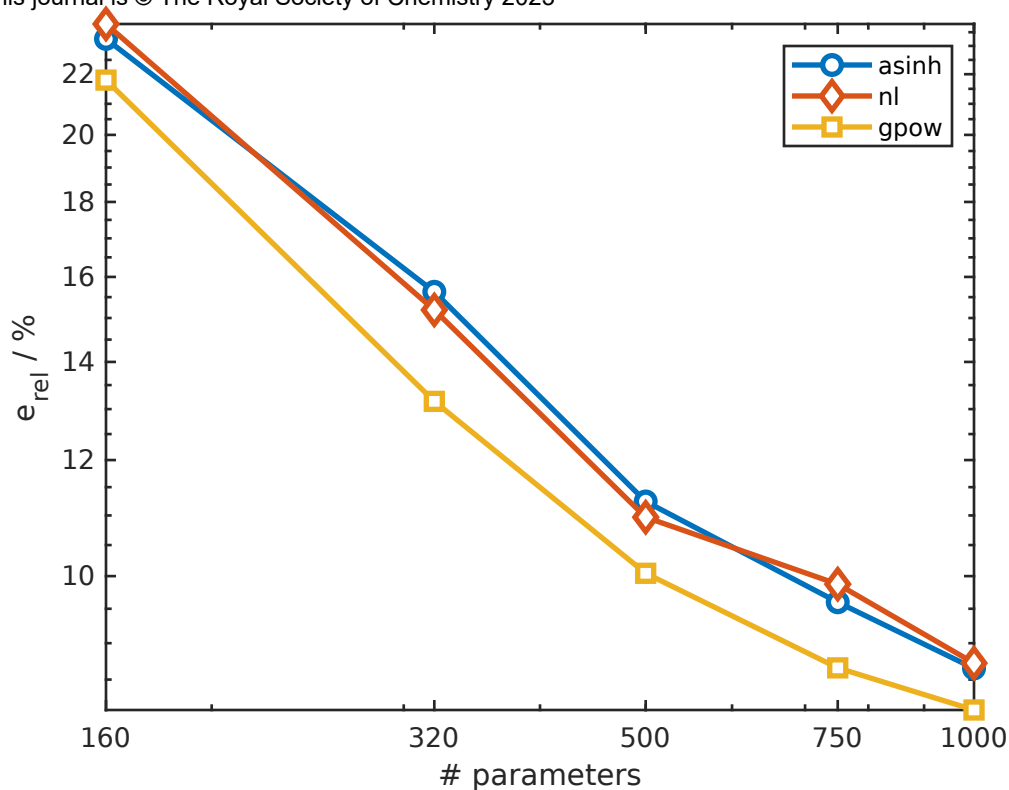

Supplement: d3re00212h6.pdf [file d3re00212h6.pdf]

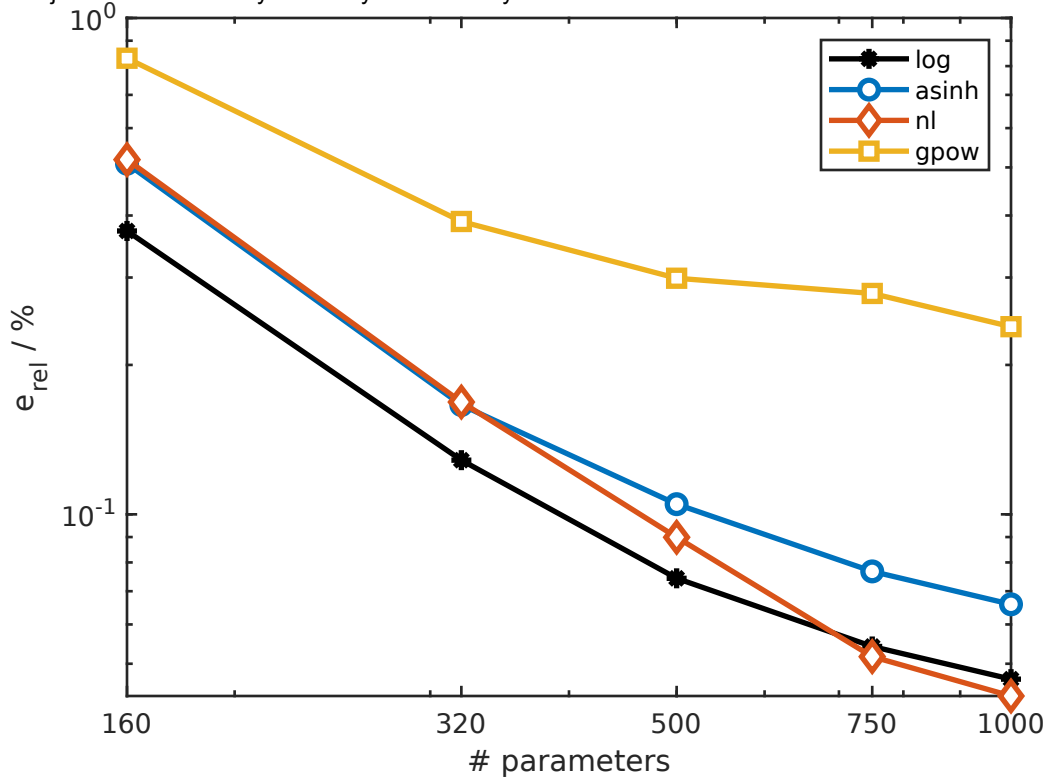

Supplement: d3re00212h7.pdf [file d3re00212h7.pdf]
